# Supplementary material
Source: HighWire-hosted journal article supplement (https://bjgp.org/highwire/filestream/27605/field_highwire_adjunct_files/0/bjpg56-820FigureS1.pdf)
Supplement: bjpg56-820FigureS1.pdf [file bjpg56-820FigureS1.pdf]

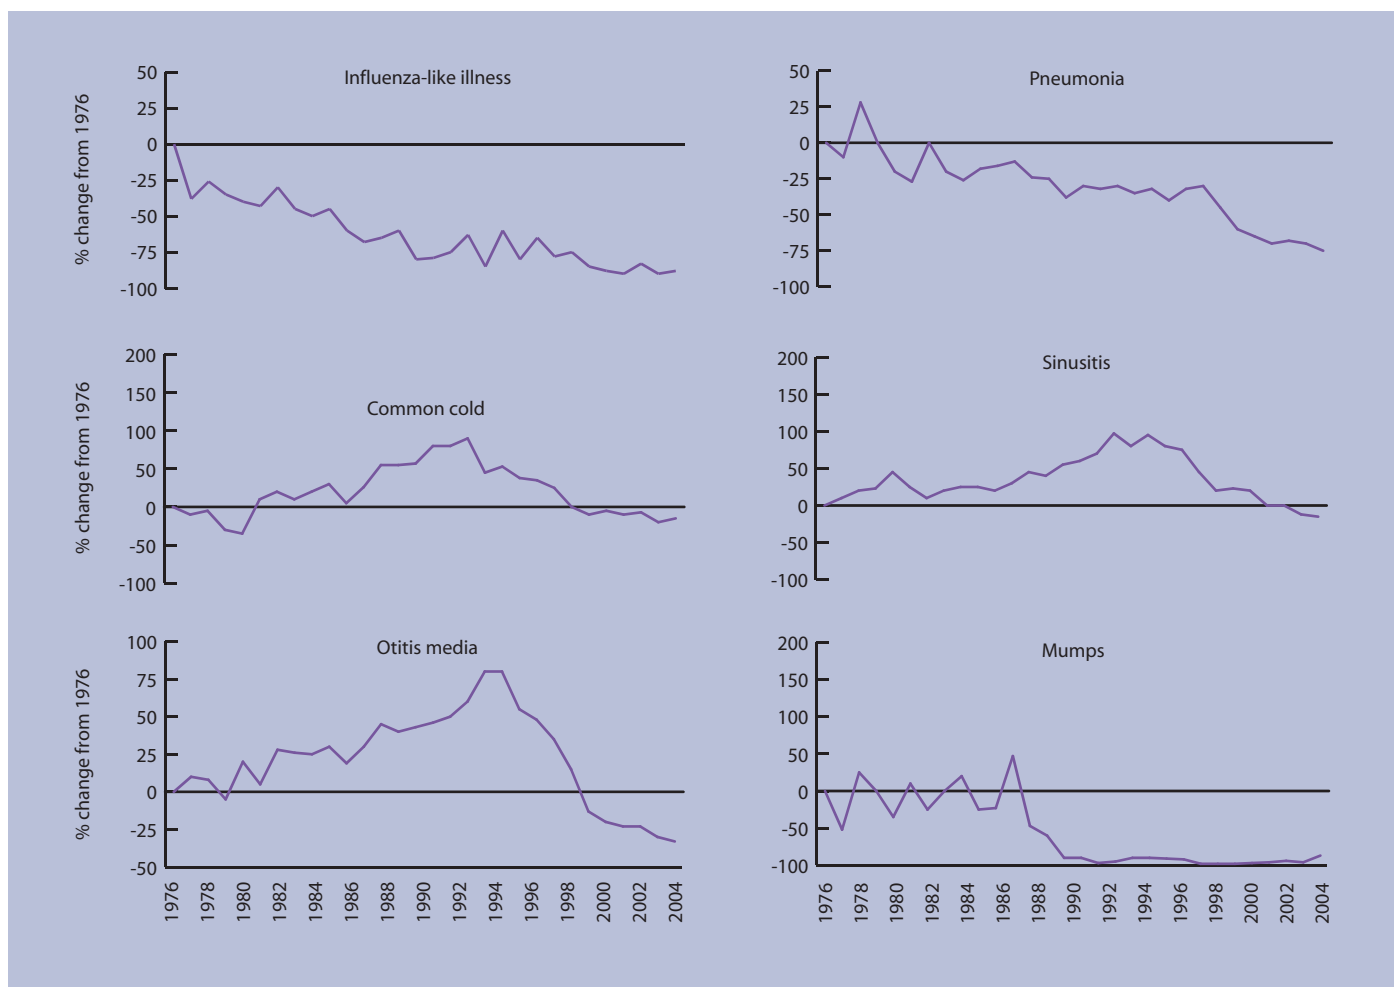

Figure 1. Percentage change since 1976 in the annual new episode incidence of selected diseases reported by the RCGP Weekly Returns Service

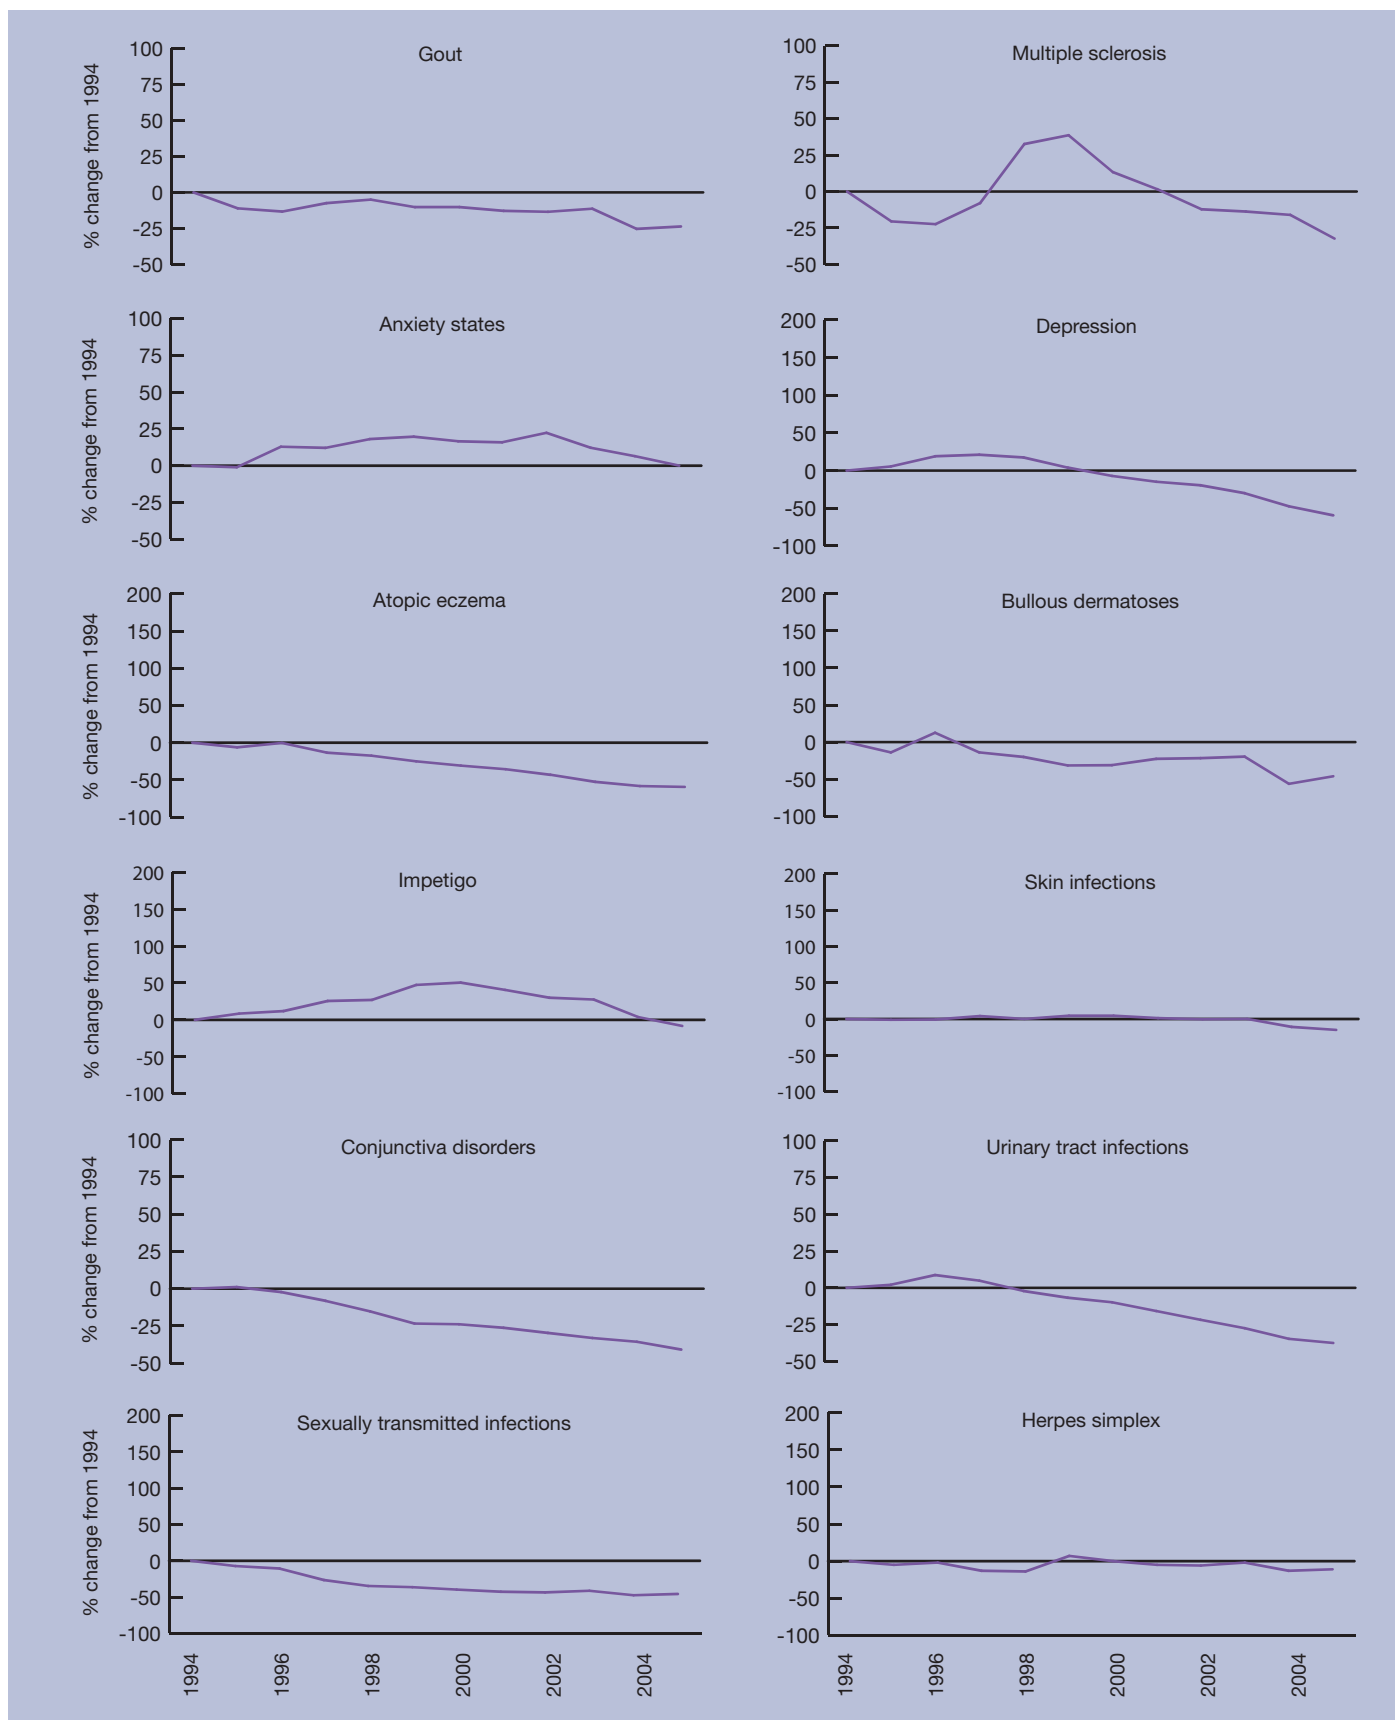

Figure 2. Percentage change since 1994 in the annual new episode incidence of selected diseases reported by the RCGP Weekly Returns Service
